# Supplementary material for: Therapeutic manipulation of IKBKAP mis-splicing with a small molecule to cure familial dysautonomia
Source: PubMed Central journal article supplement (PMC8302731; doi:10.1038/s41467-021-24705-5), 2021-07-23
Supplement: 41467_2021_24705_MOESM1_ESM.pdf [file 41467_2021_24705_MOESM1_ESM.pdf]

## Supplementary Information

### Therapeutic manipulation of *IKBKAP* mis-splicing with a small molecule to cure familial dysautonomia

**Supplementary Fig. 1.** Treatment with RECTAS, CLK inhibitors, and SRPK inhibitors in primary fibroblasts from FD patient and healthy donor. (page 2)

**Supplementary Fig. 2.** Knockdown effect of SRSF6 and CLK isoforms on *IKBKAP* exon 20 splicing in primary fibroblasts from FD patient and healthy donor. (page 3)

**Supplementary Fig. 3.** Time-course experiment for exon 20 inclusion promoting activity by RECTAS. (page 4)

**Supplementary Fig. 4.** Diagram for human *IKBKAP* and mouse *Ikkap*. (page 5)

**Supplementary Fig. 5.** RNA-Seq analysis for DRG from *IKBKAP*-FD transgenic mice treated with MOCK or RECTAS (300 mg/kg BW). (page 6)

**Supplementary Fig. 6.** Western blot analysis for knockdown efficiency. (page 7)

**Supplementary Table 1.** Summary of pre-clinical studies of RECTAS. (page 8)

**Supplementary Table 2.** List of primers used in this study. (page 9)

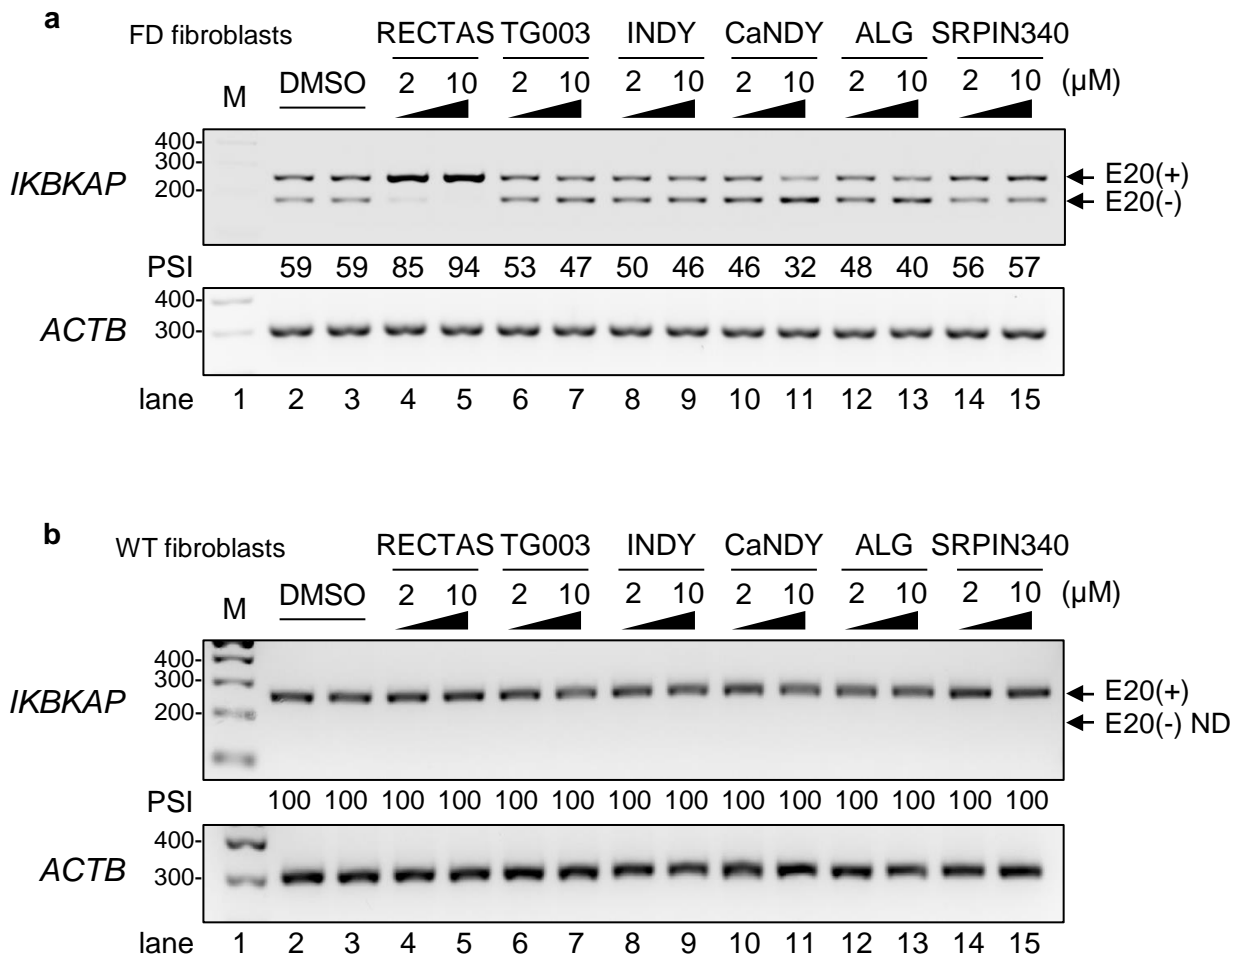

**Supplementary Fig. 1. Treatment with RECTAS, CLK inhibitors, and SRPK inhibitors in primary fibroblasts from FD patient and healthy donor.**

Compound response (24 h treatment at 2 or 10 μM) of endogenous *IKBKAP*-FD exon 20 was shown for primary fibroblasts from FD patient (P1) (a) and healthy donor (C2) (b). Solvent only (0.1% DMSO) served as a negative control, and *ACTB* served as a loading control. Representative data from two replicates are shown in (a) and (b). PSI, percent spliced-in; E20 (+) and E20 (-), exon 20 inclusion and skipping products, respectively. *IKBKAP* and *ACTB* were detected with primers oAM138+oAM139 and oAM13+oAM14, respectively.

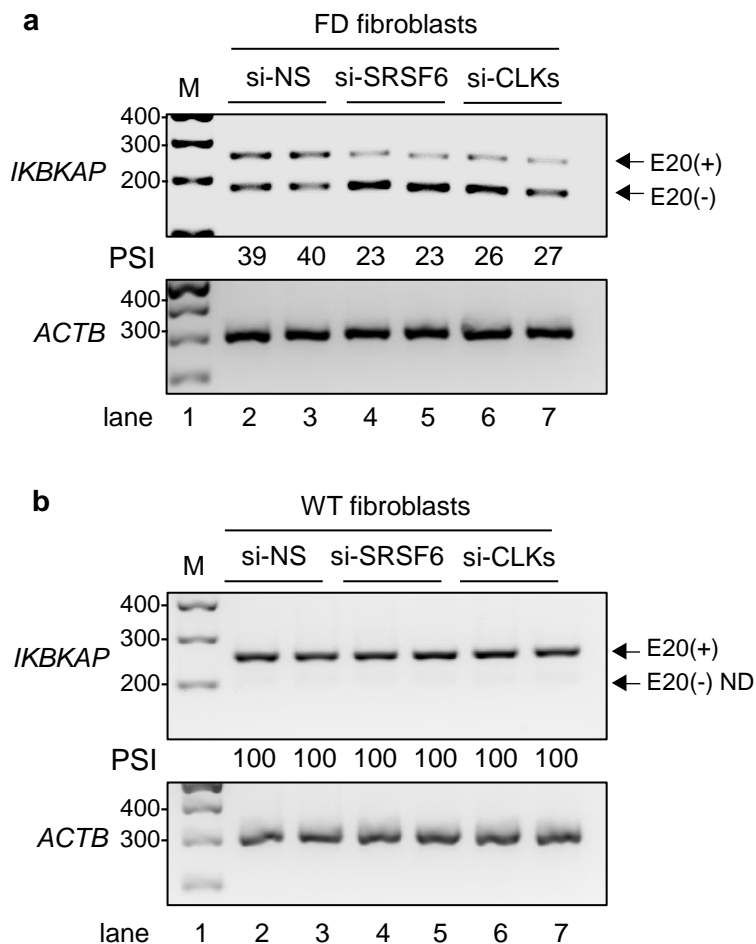

**Supplementary Fig. 2. Knockdown effect of SRSF6 and CLK isoforms on *IKBKAP* exon 20 splicing in primary fibroblasts from FD patient and healthy donor.**

Knockdown effect of SRSF6 (si-SRSF6) and CLK isoforms (si-CLKs) for endogenous *IKBKAP*-FD exon 20 was shown for primary fibroblasts from FD patient (P1) (a) and healthy donor (C2) (b). Non-targeting siRNA (si-NS) served as a negative control, and *ACTB* served as a loading control. Representative data from two replicates are shown in (a) and (b). PSI, percent spliced-in; E20 (+) and E20 (-), exon 20 inclusion and skipping products, respectively. *IKBKAP* and *ACTB* were detected with primers oAM138+oAM139 and oAM13+oAM14, respectively.

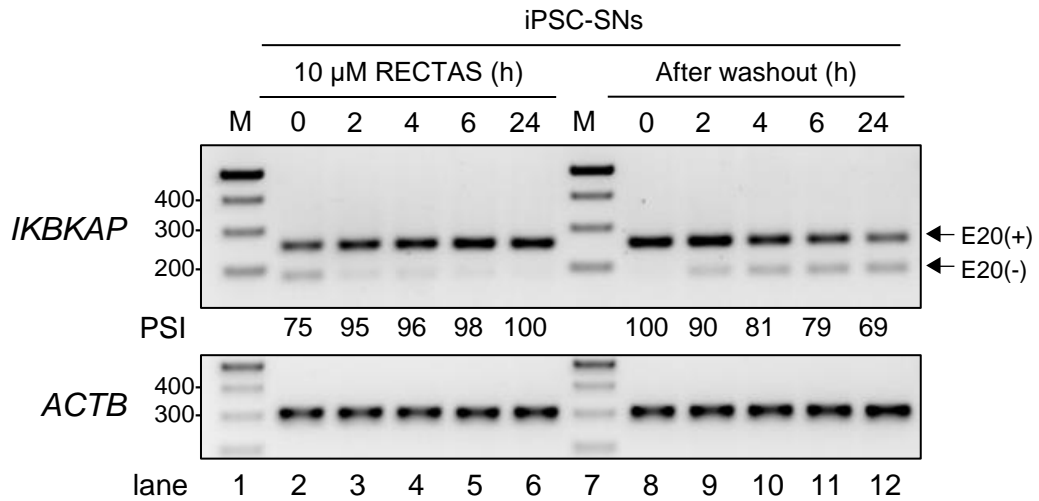

**Supplementary Fig. 3. Time-course experiment for exon 20 inclusion promoting activity by RECTAS.**

FD patient cell-derived iPSC-SNs at 12 days of induced differentiation were analyzed for *IKBKAP* exon 20 splicing at 0, 2, 4, 6, and 24 h after the RECTAS treatment (10  $\mu$ M). 24 h-RECTAS treated iPSC-SNs were also subjected to washout by PBS (-) and kept in culture media without RECTAS, and analyzed at 0, 2, 4, 6, and 24 h after the washout. *ACTB* served as a loading control. Representative data from three replicates are shown. PSI, percent spliced-in; E20 (+) and E20 (-), exon 20 inclusion and skipping products, respectively. *IKBKAP* and *ACTB* were detected with primers oAM138+oAM139 and oAM13+oAM14, respectively.

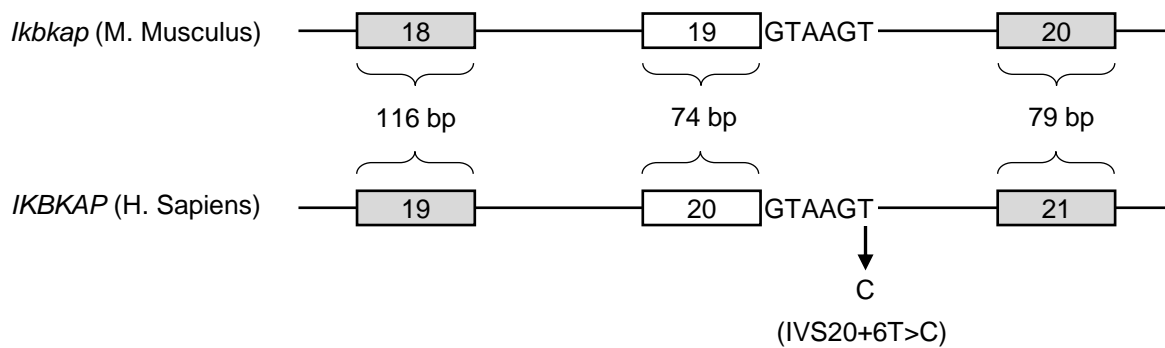

**Supplementary Fig. 4. Diagram for human *IKBKAP* and mouse *Ikkap*.**

Exon 18, 19, and 20 of mouse *Ikkap* is homologous to exon 19, 20, and 21 of human *IKBKAP* with matched exon length and surrounding intronic sequences.

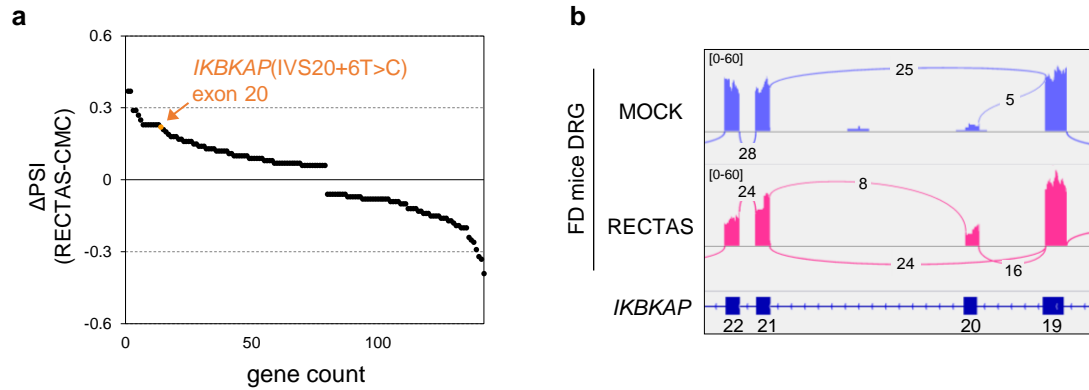

**Supplementary Fig. 5. RNA-Seq analysis for DRG from *IKBKAP*-FD transgenic mice treated with MOCK or RECTAS (300 mg/kg BW).**

(a) Differential splice events with  $>0.05$  of  $|\Delta\text{PSI} (\text{PSI}_{\text{RECTAS}} - \text{PSI}_{\text{CMC}})|$  in RECTAS (300 mg/kg BW)-administered mice over CMC-administered mice were plotted. Vertical,  $\Delta\text{PSI}$ ; Horizontal, gene count. Arrow (orange) indicates *IKBKAP*-FD exon 20 inclusion. (b) Representative sashimi plot with junction read number was shown for MOCK and RECTAS groups. *IKBKAP* gene structure is shown on the bottom. Displayed read-count range was set to 0-60.

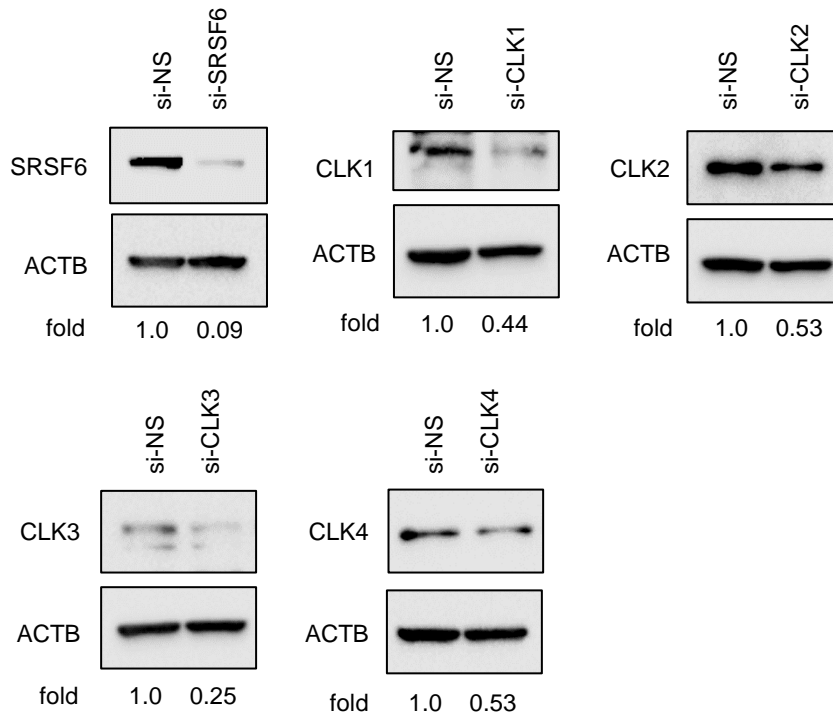

**Supplementary Fig. 6. Western blot analysis for knockdown efficiency.**

HeLa cells were transfected with non-targeting siRNA (si-NS) or siRNA targeting SRSF6, CLK1, CLK2, CLK3, and CLK4. Forty-eight hours after the transfection, each protein expression was analyzed by Western blot. Representative data from two experiments are shown. ACTB served as a loading control.

**Supplementary Table 1. Summary of pre-clinical study of RECTAS.**

| Toxicity test       | Species                                                                                                                                                                                                                                                                                                     | Dose                                                             | Route <sup>#1</sup> | Result <sup>#2</sup>         |
|---------------------|-------------------------------------------------------------------------------------------------------------------------------------------------------------------------------------------------------------------------------------------------------------------------------------------------------------|------------------------------------------------------------------|---------------------|------------------------------|
| General toxicity    |                                                                                                                                                                                                                                                                                                             | Rat (n=5) 0, 100, 300, 1,000 mg/kg BW, single dose <sup>#3</sup> | p.o.                | n/d                          |
|                     | Clinical sign or mortality<br>Body weight change<br>Necropsy check                                                                                                                                                                                                                                          |                                                                  |                     |                              |
| General toxicity    |                                                                                                                                                                                                                                                                                                             | Rat (n=3) 0, 40, 200, 1,000 mg/kg BW/day, 14 days                | p.o.                | n/d                          |
|                     | Clinical sign or mortality<br>Body weight change<br>Necropsy check<br>Food consumption<br>Hematology test <sup>#4</sup><br>(RBC, HGB, HCT, PLT, MCV,<br>MCH, MCHC, WBC, RET, PT,<br>APTT, Fbg, AST, ALT, ALP, T-Cho,<br>TG, TP, IN, CRE, T-Bil, Glu, IP, Ca,<br>Na, K, Cl)<br>Body weight, food consumption |                                                                  |                     |                              |
| Genotoxicity        | Ames test                                                                                                                                                                                                                                                                                                   |                                                                  | in vitro            | negative                     |
|                     | Micronucleus test                                                                                                                                                                                                                                                                                           |                                                                  | in vitro            | negative                     |
| Cell permeability   | Cacl-2                                                                                                                                                                                                                                                                                                      | 10 µM                                                            | in vitro            | 95.5 ± 0.02%                 |
| Metabolic stability | Human liver microsome (0.5 mg/mg)                                                                                                                                                                                                                                                                           | 1 µM                                                             | in vitro            | T <sub>1/2</sub> = 98.36 min |

<sup>#1</sup> RECTAS was resuspended in 0.5% carboxymethyl cellulose for p.o.

<sup>#2</sup> n/d, no severe toxicity attributable to RECAS administration was detected.

<sup>#3</sup> observation was conducted for 14 days following the administration.

<sup>#4</sup> RBC, red blood cell count; HGB, hemoglobin; HCT, hematocrit; PLT, platelet; MCV, mean corpuscular volume; MCH, mean corpuscular hemoglobin; MCHC, mean corpuscular hemoglobin concentration; WBC, white blood cell count; RET, reticulocyte count; PT, prothrombin time; APTT, activated partial thromboplastin time; Fbg, fasting blood glucose; AST, aspartate aminotransferase; ALT, alanine aminotransferase; ALP, alkaline phosphatase; T-Cho, total cholesterol; TG, triglycerides; TP, total protein; UN, urea nitrogen; CRE, creatinine; T-Bil, total bilirubin; Glu, glucose; IP, inorganic phosphorus; Ca, calcium; Na, sodium; K, potassium; Cl, chloride.



**Supplementary Table 2. List of primers used in this study.**

| Name        | Target gene            | Species            | orientation | sequence                        |
|-------------|------------------------|--------------------|-------------|---------------------------------|
| oAM13       | <i>ACTB</i>            | <i>H. Sapiens</i>  | forward     | 5'-CCAACCGCGAGAAGATGACC-3'      |
| oAM14       | <i>ACTB</i>            | <i>H. Sapiens</i>  | reverse     | 5'-AGCTTCTCCTTAATGTCACG-3'      |
| oAM138      | <i>IKBKAP</i>          | <i>H. Sapiens</i>  | forward     | 5'-GGATTGTCACTGTTGTGC-3'        |
| oAM139      | <i>IKBKAP</i>          | <i>H. Sapiens</i>  | reverse     | 5'-CAAGTTAATATGATTCACAGAATCT-3' |
| HsIKAPRT18F | <i>IKBKAP</i>          | <i>H. Sapiens</i>  | forward     | 5'-TGTTTTTGCCTGAGGGATGC-3'      |
| HsIKAPRT21R | <i>IKBKAP</i>          | <i>H. Sapiens</i>  | reverse     | 5'-AATGAAGGTTTCCACATTTCCA-3'    |
| oAM669      | <i>RBM24</i>           | <i>H. Sapiens</i>  | forward     | 5'-GTCTTCGGCGAGATCGAGGA-3'      |
| oAM671      | <i>RBM24</i>           | <i>H. Sapiens</i>  | reverse     | 5'-TGATCCTTGGTTTTGCTCCT-3'      |
| oAM365      | <i>Actb</i>            | <i>H. Sapiens</i>  | forward     | 5'-CCCAGAGCAAGAGAGGTATC-3'      |
| oAM366      | <i>Actb</i>            | <i>H. Sapiens</i>  | reverse     | 5'-GACGCAGGATGGCGTGAGG-3'       |
| oAM666      | <i>Ikkap</i>           | <i>M. Musculus</i> | forward     | 5'-TCACGGATCGTGACAGTTGT-3'      |
| oAM667      | <i>Ikkap</i>           | <i>M. Musculus</i> | reverse     | 5'-GGGTTATGGTCATGAATCAG-3'      |
| Rbm24-F     | <i>Rbm24</i>           | <i>M. Musculus</i> | forward     | 5'-CTGCGCAAGTACTTTGAGGTCTTCG-3' |
| Rbm24-R     | <i>Rbm24</i>           | <i>M. Musculus</i> | reverse     | 5'-GTAGACGTAGTGGGCGGGG-3'       |
| oAM124      | GST of reporter vector | -                  | forward     | 5'-TCCAGCAAGTATATAGCAT-3'       |
| oAM126      | RFP of reporter vector | -                  | reverse     | 5'-CTCCTTGATGACGTCCTCG-3'       |
