# Supplementary material for: Therapeutic manipulation of IKBKAP mis-splicing with a small molecule to cure familial dysautonomia
Source: PubMed Central journal article supplement (PMC8302731; doi:10.1038/s41467-021-24705-5), 2021-07-23
Supplement: 41467_2021_24705_MOESM4_ESM.pdf [file 41467_2021_24705_MOESM4_ESM.pdf]

**Supplementary Data 1.** Altered splice events following RECTAS treatment in FD patient fibroblasts.

**Supplementary Data 2.** Altered splice events in IKBKAP IVS20+6T>C transgenic mice DRG by RECTAS treatment (300 mg/kg BW).
